# Supplementary material for: Azide-tagged sphingolipids for the proteome-wide identification of C16-ceramide-binding proteins
Source: Royal Society of Chemistry journal article supplement (doi:10.1039/c8cc05691a), 2018-01-01
Supplement: c8cc05691a1.pdf [file c8cc05691a1.pdf]

### Supplementary Tables

**Table S1.** Proteins defined as hits in at least 8 out of 12 affinity enrichments and on-bead tryptic digestion (overlapped proteins are highlighted in grey).

| Gene Name       | Protein Name                                               |
|-----------------|------------------------------------------------------------|
| <b>Abhd12</b>   | Monoacylglycerol lipase ABHD12                             |
| <b>Acads</b>    | Short-chain specific acyl-CoA dehydrogenase, mitochondrial |
| <b>Acbd5</b>    | Acyl-CoA-binding domain-containing protein 5               |
| <b>Acin1</b>    | Apoptotic chromatin condensation inducer in the nucleus    |
| <b>Acp1</b>     | Low molecular weight phosphotyrosine protein phosphatase   |
| <b>Acs16</b>    | Long-chain-fatty-acid--CoA ligase 6                        |
| <b>Agk</b>      | Acylglycerol kinase, mitochondrial                         |
| <b>Agpat5</b>   | 1-acyl-sn-glycerol-3-phosphate acyltransferase epsilon     |
| <b>Aifm1</b>    | Apoptosis-inducing factor 1, mitochondrial                 |
| <b>Aifm2</b>    | Apoptosis-inducing factor 2                                |
| <b>Aldh3a2</b>  | Aldehyde dehydrogenase;Fatty aldehyde dehydrogenase        |
| <b>Aldh3b1</b>  | Aldehyde dehydrogenase family 3 member B1                  |
| <b>Aldh7a1</b>  | Alpha-aminoadipic semialdehyde dehydrogenase               |
| <b>Alg2</b>     | Alpha-1,3/1,6-mannosyltransferase ALG2                     |
| <b>Anapc7</b>   | Anaphase-promoting complex subunit 7                       |
| <b>Api5</b>     | Apoptosis inhibitor 5                                      |
| <b>Apob</b>     | Apolipoprotein B-100;Apolipoprotein B-48                   |
| <b>APP</b>      | Amyloid beta A4 protein;N-APP                              |
| <b>Arl1</b>     | ADP-ribosylation factor-like protein 1                     |
| <b>Arl8a</b>    | ADP-ribosylation factor-like protein 8A                    |
| <b>Arl8b</b>    | ADP-ribosylation factor-like protein 8B                    |
| <b>Asah1</b>    | Acid ceramidase;Acid ceramidase subunit alpha; beta        |
| <b>Atad2</b>    | ATPase family AAA domain-containing protein 2              |
| <b>Atad2b</b>   | MKIAA1240 protein                                          |
| <b>Atp13a1</b>  | Manganese-transporting ATPase 13A1                         |
| <b>Atp5e</b>    | ATP synthase subunit epsilon, mitochondrial                |
| <b>Atp5l</b>    | ATP synthase subunit g, mitochondrial                      |
| <b>Bax</b>      | Apoptosis regulator BAX                                    |
| <b>Bcas2</b>    | Pre-mRNA-splicing factor SPF27                             |
| <b>Bcl-xL</b>   | Bcl-2-like protein 1                                       |
| <b>Bcl2l13</b>  | Bcl-2-like protein 13                                      |
| <b>Bclaf1</b>   | Bcl-2-associated transcription factor 1                    |
| <b>Bik</b>      | BCL2-interacting killer (apoptosis-inducing)               |
| <b>Birc5</b>    | Baculoviral IAP repeat-containing protein 5                |
| <b>Bud31</b>    | Protein Bud31 homolog                                      |
| <b>Bysl</b>     | Bystin                                                     |
| <b>Cand2</b>    | Cullin-associated NEDD8-dissociated protein 2              |
| <b>Cbr1</b>     | Carbonyl reductase [NADPH] 1                               |
| <b>Cdk5</b>     | Cyclin-dependent-like kinase 5                             |
| <b>Cdk5rap2</b> | CDK5 regulatory subunit-associated protein 2               |
| <b>Celf1</b>    | CUGBP Elav-like family member 1                            |

|                                 |                                                                  |
|---------------------------------|------------------------------------------------------------------|
| <b>Celf4</b>                    | CUGBP Elav-like family member 4                                  |
| <b>Cers2</b>                    | Ceramide synthase 2                                              |
| <b>Cers4</b>                    | Ceramide synthase 4                                              |
| <b>Chd7;<br/>Chd6;<br/>Chd9</b> | Chromodomain-helicase-DNA-binding protein 7; 6; 9                |
| <b>Cog7</b>                     | Conserved oligomeric Golgi complex subunit 7                     |
| <b>Coq9</b>                     | Ubiquinone biosynthesis protein COQ9, mitochondrial              |
| <b>Cpsf3</b>                    | Cleavage and polyadenylation specificity factor subunit 3        |
| <b>Cpt2</b>                     | Carnitine O-palmitoyltransferase 2, mitochondrial                |
| <b>Csnk1e;<br/>Csnk1d</b>       | Casein kinase I isoform epsilon;Casein kinase I isoform delta    |
| <b>Ctps1</b>                    | CTP synthase 1                                                   |
| <b>Ctsb</b>                     | Cathepsin B;Cathepsin B light chain;Cathepsin B heavy chain      |
| <b>Cycl</b>                     | Cytochrome c1, heme protein, mitochondrial                       |
| <b>Dazap1</b>                   | DAZ-associated protein 1                                         |
| <b>Dcakd</b>                    | Dephospho-CoA kinase domain-containing protein                   |
| <b>Ddx23</b>                    | Protein Ddx23                                                    |
| <b>Ddx24</b>                    | ATP-dependent RNA helicase DDX24                                 |
| <b>Ddx54</b>                    | ATP-dependent RNA helicase DDX54                                 |
| <b>Degs1</b>                    | Sphingolipid delta(4)-desaturase DES1                            |
| <b>Desi1</b>                    | Desumoylating isopeptidase 1                                     |
| <b>Dhx36</b>                    | ATP-dependent RNA helicase DHX36                                 |
| <b>Ecm29;<br/>AI314180</b>      | Proteasome-associated protein ECM29 homolog                      |
| <b>Eif1;<br/>Eif1b</b>          | Eukaryotic translation initiation factor 1b                      |
| <b>Emc8</b>                     | ER membrane protein complex subunit 8                            |
| <b>Erap1</b>                    | Endoplasmic reticulum aminopeptidase 1                           |
| <b>Ergic1</b>                   | Endoplasmic reticulum-Golgi intermediate compartment protein 1   |
| <b>Erh</b>                      | Enhancer of rudimentary homolog                                  |
| <b>Exoc5</b>                    | Exocyst complex component 5                                      |
| <b>Fads1</b>                    | Fatty acid desaturase 1                                          |
| <b>Fads2</b>                    | Fatty acid desaturase 2                                          |
| <b>Fam162a</b>                  | Protein FAM162A                                                  |
| <b>Fam208b</b>                  | Protein FAM208B                                                  |
| <b>Fam210a</b>                  | Protein FAM210A                                                  |
| <b>Gbf1</b>                     | Prostaglandin E synthase 2                                       |
| <b>Gemin5</b>                   | Gem-associated protein 5                                         |
| <b>Gfpt1</b>                    | Glutamine--fructose-6-phosphate aminotransferase [isomerizing] 1 |
| <b>Gga2</b>                     | ADP-ribosylation factor-binding protein GGA2                     |
| <b>Ghdc</b>                     | GH3 domain-containing protein                                    |
| <b>Glipr2</b>                   | Golgi-associated plant pathogenesis-related protein 1            |
| <b>Glmn</b>                     | Glomulin                                                         |
| <b>Glyr1</b>                    | Putative oxidoreductase GLYR1                                    |
| <b>Gnai1;Gnai3G<br/>nai2</b>    | Guanine nucleotide-binding protein G(i/k) subunit alpha-1        |

|                         |                                                                          |
|-------------------------|--------------------------------------------------------------------------|
| <b>Gnpat</b>            | Dihydroxyacetone phosphate acyltransferase                               |
| <b>Golga5</b>           | Golgin subfamily A member 5                                              |
| <b>Got2</b>             | Aspartate aminotransferase, mitochondrial                                |
| <b>Gpx4</b>             | Glutathione peroxidase;Phospholipid hydroperoxide glutathione peroxidase |
| <b>Hccs</b>             | Cytochrome c-type heme lyase                                             |
| <b>Htra2</b>            | Serine protease HTRA2, mitochondrial                                     |
| <b>Idh2</b>             | Isocitrate dehydrogenase [NADP], mitochondrial                           |
| <b>Iivbl</b>            | Acetolactate synthase-like protein                                       |
| <b>Imp4</b>             | U3 small nucleolar ribonucleoprotein protein IMP4                        |
| <b>Impa1</b>            | Inositol monophosphatase 1                                               |
| <b>Incenp</b>           | Inner centromere protein                                                 |
| <b>Ing4</b>             | Inhibitor of growth protein 4                                            |
| <b>Ing5</b>             | Inhibitor of growth protein 5                                            |
| <b>Ints4</b>            | Integrator complex subunit 4                                             |
| <b>Itga1</b>            | Integrin alpha-1                                                         |
| <b>Kpna1;<br/>Kpna6</b> | Importin subunit alpha-5, N-terminally processed                         |
| <b>Kras</b>             | GTPase KRas;GTPase KRas, N-terminally processed                          |
| <b>Lars2</b>            | Probable leucine--tRNA ligase, mitochondrial                             |
| <b>LASS2</b>            | LAG1 homolog, Ceramide synthase 2                                        |
| <b>LASS4</b>            | LAG1 homolog, Ceramide synthase 4                                        |
| <b>LASS6</b>            | LAG1 homolog, Ceramide synthase 6                                        |
| <b>Lgals1</b>           | Galectin-1                                                               |
| <b>Lgals3</b>           | Galectin-3                                                               |
| <b>Lrif1</b>            | Ligand-dependent nuclear receptor-interacting factor 1                   |
| <b>Ltn1</b>             | E3 ubiquitin-protein ligase listerin                                     |
| <b>Lypla1</b>           | Acyl-protein thioesterase 1                                              |
| <b>Lyplal1</b>          | Lysophospholipase-like protein 1                                         |
| <b>Maged1</b>           | Melanoma-associated antigen D1                                           |
| <b>Mccc1</b>            | Methylcrotonoyl-CoA carboxylase subunit alpha, mitochondrial             |
| <b>Mcu</b>              | Calcium uniporter protein, mitochondrial                                 |
| <b>Meaf6</b>            | Chromatin modification-related protein MEAF6                             |
| <b>Mif</b>              | Macrophage migration inhibitory factor                                   |
| <b>Mlec</b>             | Malectin                                                                 |
| <b>Mon2</b>             | Protein MON2 homolog                                                     |
| <b>Mospd2</b>           | Motile sperm domain-containing protein 2                                 |
| <b>Mpc2</b>             | Mitochondrial pyruvate carrier 2                                         |
| <b>Mphosph8</b>         | M-phase phosphoprotein 8                                                 |
| <b>Mrpl47</b>           | 39S ribosomal protein L47, mitochondrial                                 |
| <b>Mtch2</b>            | Mitochondrial carrier homolog 2                                          |
| <b>Mtor</b>             | Serine/threonine-protein kinase mTOR                                     |
| <b>Mtx1</b>             | Metaxin-1                                                                |
| <b>Mtx2</b>             | Metaxin-2                                                                |
| <b>Mxra7</b>            | Matrix-remodeling-associated protein 7                                   |
| <b>Mycbp</b>            | C-Myc-binding protein                                                    |
| <b>Myg1</b>             | UPF0160 protein MYG1, mitochondrial                                      |

|                  |                                                                           |
|------------------|---------------------------------------------------------------------------|
| <b>My112b</b>    | Myosin regulatory light chain 12B                                         |
| <b>Myo1c</b>     | Unconventional myosin-Ic                                                  |
| <b>Napa</b>      | Alpha-soluble NSF attachment protein                                      |
| <b>Nceh1</b>     | Neutral cholesterol ester hydrolase 1                                     |
| <b>Ncoa5</b>     | Nuclear receptor coactivator 5                                            |
| <b>Ndc1</b>      | Nucleoporin NDC1                                                          |
| <b>Ndufa4</b>    | Cytochrome c oxidase subunit NDUFA4                                       |
| <b>Ndufa7</b>    | NADH dehydrogenase [ubiquinone] 1 alpha subcomplex subunit 7              |
| <b>Ndufa8</b>    | NADH dehydrogenase [ubiquinone] 1 alpha subcomplex subunit 8              |
| <b>Ndufc2</b>    | NADH dehydrogenase [ubiquinone] 1 subunit C2                              |
| <b>Ndufs5</b>    | NADH dehydrogenase [ubiquinone] iron-sulfur protein 5                     |
| <b>Nfx11</b>     | Nfx11 protein                                                             |
| <b>Nol8</b>      | Nucleolar protein 8                                                       |
| <b>Nop9</b>      | Nucleolar protein 9                                                       |
| <b>Nras;Hras</b> | GTPase NRas;GTPase HRas;GTPase HRas, N-terminally processed               |
| <b>Nsun5</b>     | Probable 28S rRNA (cytosine-C(5))-methyltransferase                       |
| <b>Nubpl</b>     | Iron-sulfur protein NUBPL                                                 |
| <b>Nup155</b>    | Nuclear pore complex protein Nup155                                       |
| <b>Nup85</b>     | Nuclear pore complex protein Nup85                                        |
| <b>Nusap1</b>    | Nucleolar and spindle-associated protein 1                                |
| <b>Oxa11</b>     | Mitochondrial inner membrane protein OXA1L                                |
| <b>Pa2g4</b>     | Proliferation-associated protein 2G4                                      |
| <b>Pam16</b>     | Mitochondrial import inner membrane translocase subunit TIM16             |
| <b>Pbrm1</b>     | Protein polybromo-1                                                       |
| <b>Pcnt</b>      | Pericentrin                                                               |
| <b>Pdxk</b>      | Pyridoxal kinase                                                          |
| <b>Pebp1</b>     | Phosphatidylethanolamine-binding protein 1                                |
| <b>Pfn2</b>      | Profilin-2;Profilin                                                       |
| <b>Phf14</b>     | PHD finger protein 14                                                     |
| <b>Phip</b>      | PH-interacting protein                                                    |
| <b>Plrg1</b>     | Pleiotropic regulator 1                                                   |
| <b>Pmpca</b>     | Mitochondrial-processing peptidase subunit alpha                          |
| <b>Ppan</b>      | Suppressor of SWI4 1 homolog                                              |
| <b>Pphln1</b>    | Periphilin-1                                                              |
| <b>Ppig</b>      | Peptidyl-prolyl cis-trans isomerase G;Peptidyl-prolyl cis-trans isomerase |
| <b>Ppox</b>      | Protoporphyrinogen oxidase                                                |
| <b>Ppp2r1b</b>   | Serine/threonine-protein phosphatase 2A 65 kDa regulatory subunit A beta  |
| <b>Ppp2r5a</b>   | Serine/threonine-protein phosphatase 2A 56 kDa regulatory subunit alpha   |
| <b>Ppt1</b>      | Palmitoyl-protein thioesterase 1                                          |
| <b>Prdx5</b>     | Peroxiredoxin-5, mitochondrial                                            |
| <b>Prkar2b</b>   | cAMP-dependent protein kinase type II-beta regulatory subunit             |
| <b>Prpf38a</b>   | Pre-mRNA-splicing factor 38A                                              |
| <b>Psmg2</b>     | Proteasome assembly chaperone 2                                           |
| <b>Psph</b>      | Phosphoserine phosphatase                                                 |
| <b>Ptar1</b>     | Protein Ptar1                                                             |

|                           |                                                                      |
|---------------------------|----------------------------------------------------------------------|
| <b>Ptges2</b>             | Prostaglandin E synthase 2;Prostaglandin E synthase 2 truncated form |
| <b>Ptpn1</b>              | Tyrosine-protein phosphatase non-receptor type 1                     |
| <b>Rae1</b>               | mRNA export factor                                                   |
| <b>Rala</b>               | Ras-related protein Ral-A                                            |
| <b>Rars2</b>              | Probable arginine--tRNA ligase, mitochondrial                        |
| <b>Rfc2</b>               | Replication factor C subunit 2                                       |
| <b>Rngtt</b>              | mRNA-capping enzyme;Polynucleotide 5-triphosphatase                  |
| <b>Rpl18a</b>             | 60S ribosomal protein L18a                                           |
| <b>Rpl37a</b>             | 60S ribosomal protein L37a                                           |
| <b>Rps29;<br/>Gm10126</b> | 40S ribosomal protein S29                                            |
| <b>Rtca;RtcA</b>          | RNA 3-terminal phosphate cyclase                                     |
| <b>Sar1b</b>              | GTP-binding protein SAR1b                                            |
| <b>Sdcbp</b>              | Syntenin-1                                                           |
| <b>Sec14l1</b>            | SEC14-like protein 1                                                 |
| <b>Sec24a</b>             | Protein transport protein Sec24A                                     |
| <b>Sec24d</b>             | Protein Sec24d                                                       |
| <b>Sec62</b>              | Translocation protein SEC62                                          |
| <b>Sgpl1</b>              | Sphingosine-1-phosphate lyase 1                                      |
| <b>Slc1a4</b>             | Neutral amino acid transporter A                                     |
| <b>Slc1a5</b>             | Neutral amino acid transporter B(0)                                  |
| <b>Smpd3</b>              | Sphingomyelin phosphodiesterase 3                                    |
| <b>Smpd4</b>              | Sphingomyelin phosphodiesterase 4                                    |
| <b>Snap25</b>             | Synaptosomal-associated protein 25                                   |
| <b>Snrpd1</b>             | Small nuclear ribonucleoprotein Sm D1                                |
| <b>Snx8</b>               | Sorting nexin-8                                                      |
| <b>Spes3</b>              | Signal peptidase complex subunit 3                                   |
| <b>Spg7</b>               | Paraplegin                                                           |
| <b>Spryd7</b>             | SPRY domain-containing protein 7                                     |
| <b>Srrm1</b>              | Serine/arginine repetitive matrix protein 1                          |
| <b>Sun1</b>               | SUN domain-containing protein 1                                      |
| <b>Tamm41</b>             | Phosphatidate cytidyltransferase, mitochondrial                      |
| <b>Tbc1d15</b>            | TBC1 domain family member 15                                         |
| <b>Tbl2</b>               | Transducin beta-like protein 2                                       |
| <b>Tcf20</b>              | Transcription factor 20                                              |
| <b>Tfip11</b>             | Tuftelin-interacting protein 11                                      |
| <b>Tmed4</b>              | Transmembrane emp24 domain-containing protein 4                      |
| <b>Tmem263</b>            | Transmembrane protein 263                                            |
| <b>Tmpo</b>               | Lamina-associated polypeptide 2, isoforms alpha/zeta                 |
| <b>Tmx4</b>               | Thioredoxin-related transmembrane protein 4                          |
| <b>Tnpo3</b>              | Transportin-3                                                        |
| <b>Top2b</b>              | DNA topoisomerase 2-beta                                             |
| <b>Tor1aip1</b>           | Torsin-1A-interacting protein 1                                      |
| <b>Tor1b</b>              | Torsin-1B                                                            |
| <b>Tor3a</b>              | Torsin-3A                                                            |

|                                 |                                                            |
|---------------------------------|------------------------------------------------------------|
| <b>Trim32</b>                   | E3 ubiquitin-protein ligase TRIM32                         |
| <b>Trip12</b>                   | E3 ubiquitin-protein ligase TRIP12                         |
| <b>Trmt11</b>                   | TRMT1-like protein                                         |
| <b>Trmt2a</b>                   | tRNA (uracil-5-)-methyltransferase homolog A               |
| <b>Ttc39b</b>                   | Tetratricopeptide repeat protein 39B                       |
| <b>Tuba1b;</b><br><b>Tuba4a</b> | Tubulin alpha-1B chain;Tubulin alpha-4A chain              |
| <b>Tubb6</b>                    | Tubulin beta-6 chain                                       |
| <b>Tubgcp3</b>                  | Gamma-tubulin complex component 3                          |
| <b>Ube3c</b>                    | Ubiquitin-protein ligase E3C                               |
| <b>Ubl5;</b><br><b>Gm16381</b>  | Ubiquitin-like protein 5                                   |
| <b>Ubxn4</b>                    | UBX domain-containing protein 4                            |
| <b>Uchl5</b>                    | Ubiquitin carboxyl-terminal hydrolase isozyme L5           |
| <b>Uqcc2</b>                    | Ubiquinol-cytochrome-c reductase complex assembly factor 2 |
| <b>Utp20</b>                    | Small subunit processome component 20 homolog              |
| <b>Utp6</b>                     | U3 small nucleolar RNA-associated protein 6 homolog        |
| <b>Xrcc1</b>                    | DNA repair protein XRCC1                                   |

**Table S2.** Proteins defined as hits in the Protein microarray analysis (overlapped proteins are highlighted in grey).

| <b>Gene Name</b> | <b>Protein Name</b>                                                               |
|------------------|-----------------------------------------------------------------------------------|
| <b>PLA2G15</b>   | 1-O-acylceramide synthase                                                         |
| <b>ABHD10</b>    | abhydrolase domain containing 10 (ABHD10)                                         |
| <b>ABHD1</b>     | Abhydrolase domain-containing protein 1                                           |
| <b>ACAT1</b>     | acetyl-Coenzyme A acetyltransferase 1 (acetoacetyl Coenzyme A thiolase) (ACAT1)   |
| <b>ACP1</b>      | acid phosphatase 1, soluble (ACP1), transcript variant 1                          |
| <b>ACOT11</b>    | Acyl-CoA thioesterase 11 (ACOT11), transcript variant 1, mRNA                     |
| <b>ACBD7</b>     | acyl-Coenzyme A binding domain containing 7 (ACBD7)                               |
| <b>ACOT4</b>     | Acyl-coenzyme A thioesterase 4                                                    |
| <b>ARL4C</b>     | ADP-ribosylation factor-like 4C (ARL4C)                                           |
| <b>ALDH3B1</b>   | Aldehyde dehydrogenase 3 family, member B1 (ALDH3B1), transcript variant 2, mRNA  |
| <b>ORM1</b>      | Alpha-1-acid glycoprotein 1                                                       |
| <b>APP</b>       | amyloid beta (A4) precursor protein (peptidase nexin-II, Alzheimer disease) (APP) |
| <b>APOA1BP</b>   | apolipoprotein A-I binding protein (APOA1BP)                                      |
| <b>APOA2</b>     | apolipoprotein A-II (APOA2)                                                       |
| <b>APOA4</b>     | Apolipoprotein A-IV                                                               |
| <b>APOBEC3C</b>  | apolipoprotein B mRNA editing enzyme, catalytic polypeptide-like 3C (APOBEC3C)    |
| <b>APOBEC3H</b>  | apolipoprotein B mRNA editing enzyme, catalytic polypeptide-like 3H (APOBEC3H)    |
| <b>APOC4</b>     | apolipoprotein C-IV (APOC4)                                                       |
| <b>APOF</b>      | Apolipoprotein F                                                                  |
| <b>APOL3</b>     | Apolipoprotein L, 3 (APOL3), transcript variant alpha/a, mRNA                     |
| <b>APOL6</b>     | apolipoprotein L, 6 (APOL6)                                                       |
| <b>APOL2</b>     | Apolipoprotein L2                                                                 |
| <b>APOM</b>      | apolipoprotein M (APOM)                                                           |

|                    |                                                                                                  |
|--------------------|--------------------------------------------------------------------------------------------------|
| <b>APOOL</b>       | apolipoprotein O-like (APOOL)                                                                    |
| <b>AIFM2</b>       | Apoptosis-inducing factor 2                                                                      |
| <b>AIFM3</b>       | apoptosis-inducing factor, mitochondrion-associated, 3 (AIFM3)                                   |
| <b>C2orf28</b>     | Apoptosis-related protein 3                                                                      |
| <b>BIRC5</b>       | baculoviral IAP repeat-containing 5 (survivin) (BIRC5), transcript variant 1                     |
| <b>BCL2L12</b>     | Bcl-2-related proline-rich protein                                                               |
| <b>BCL2L2</b>      | BCL-W / BCL2L2 Protein (His Tag)                                                                 |
| <b>BIK</b>         | BCL2-interacting killer (apoptosis-inducing) (BIK)                                               |
| <b>BCL2L11</b>     | BCL2-like 11 (apoptosis facilitator) (BCL2L11), transcript variant 3                             |
| <b>BCL2L14</b>     | BCL2-like 14 (apoptosis facilitator) (BCL2L14), transcript variant 1                             |
| <b>BUD31</b>       | BUD31 homolog ( <i>S. cerevisiae</i> ) (BUD31)                                                   |
| <b>MYCBP</b>       | c-myc binding protein (MYCBP)                                                                    |
| <b>CDK6</b>        | Cell division protein kinase 6                                                                   |
| <b>COQ6</b>        | coenzyme Q6 homolog, monooxygenase ( <i>S. cerevisiae</i> ) (COQ6), transcript variant 2         |
| <b>CDK5</b>        | cyclin-dependent kinase 5 (CDK5) and p25: CDK5 and p25 sequences are seperated by -- (in protein |
| <b>CDK7</b>        | cyclin-dependent kinase 7 (MO15 homolog, <i>Xenopus laevis</i> , cdk-activating kinase) (CDK7)   |
| <b>CDKL1</b>       | Cyclin-dependent kinase-like 1                                                                   |
| <b>PLA2G4C</b>     | Cytosolic phospholipase A2 gamma                                                                 |
| <b>ERGIC1</b>      | endoplasmic reticulum-golgi intermediate compartment (ERGIC) 1 (ERGIC1)                          |
| <b>FAAH2</b>       | fatty acid amide hydrolase 2 (FAAH2)                                                             |
| <b>FABP3</b>       | fatty acid binding protein 3, muscle and heart (mammary-derived growth inhibitor) (FABP3)        |
| <b>FADS2</b>       | fatty acid desaturase 2 (FADS2)                                                                  |
| <b>FRAP1(mTOR)</b> | Serine/threonine kinase                                                                          |
| <b>GABRA3</b>      | gamma-aminobutyric acid (GABA) A receptor, alpha 3 (GABRA3)                                      |
| <b>GABRA6</b>      | Gamma-aminobutyric acid (GABA) A receptor, alpha 6 (GABRA6), mRNA                                |
| <b>GPX4</b>        | glutathione peroxidase 4 (phospholipid hydroperoxidase) (GPX4)                                   |
| <b>GDPD5</b>       | glycerophosphodiester phosphodiesterase domain containing 5 (GDPD5)                              |
| <b>HEATR2</b>      | HEAT repeat containing 2 (HEATR2)                                                                |
| <b>IPO11</b>       | importin 11 (IPO11)                                                                              |
| <b>IPO4</b>        | Importin-4                                                                                       |
| <b>IPO9</b>        | Importin-9                                                                                       |
| <b>ICMT</b>        | Isoprenylcysteine carboxyl methyltransferase (ICMT), transcript variant 2, mRNA                  |
| <b>CERS1</b>       | LAG1 homolog, ceramide synthase 1 ( <i>S. cerevisiae</i> ), mRNA (                               |
| <b>LASS4</b>       | LAG1 homolog, ceramide synthase 4 (LASS4)                                                        |
| <b>LASS6</b>       | LAG1 homolog, ceramide synthase 6, mRNA (cDNA clone IMAGE:4396549), complete cds.                |
| <b>LAS1L</b>       | LAS1-like ( <i>S. cerevisiae</i> ) (LAS1L)                                                       |
| <b>LGALS1</b>      | lectin, galactoside-binding, soluble, 1 (galectin 1) (LGALS1)                                    |
| <b>LGALS14</b>     | lectin, galactoside-binding, soluble, 14 (LGALS14)                                               |
| <b>LGALS2</b>      | lectin, galactoside-binding, soluble, 2 (LGALS2)                                                 |
| <b>LGALS3</b>      | lectin, galactoside-binding, soluble, 3 (LGALS3)                                                 |
| <b>LGALS3</b>      | lectin, galactoside-binding, soluble, 3 (LGALS3)                                                 |
| <b>LGALS3</b>      | LGALS3 / Galectin-3 Protein (Native)                                                             |
| <b>ACSBG1</b>      | Long-chain-fatty-acid--CoA ligase ACSBG1                                                         |
| <b>LYPLA2</b>      | lysophospholipase II (LYPLA2)                                                                    |
| <b>LYPLAL1</b>     | lysophospholipase-like 1 (LYPLAL1)                                                               |

|                 |                                                                                               |
|-----------------|-----------------------------------------------------------------------------------------------|
| <b>LAPTM5</b>   | Lysosomal-associated multispanning membrane protein-5 (LAPTM5), mRNA                          |
| <b>LAPTM4A</b>  | lysosomal-associated protein transmembrane 4 alpha (LAPTM4A)                                  |
| <b>MARK2</b>    | MAP/microtubule affinity-regulating kinase 2 (MARK2), transcript variant 3                    |
| <b>MAT1A</b>    | methionine adenosyltransferase I, alpha (MAT1A)                                               |
| <b>MAP1LC3A</b> | microtubule-associated protein 1 light chain 3 alpha (MAP1LC3A), transcript variant 1         |
| <b>MAP1LC3A</b> | microtubule-associated protein 1 light chain 3 alpha (MAP1LC3A), transcript variant 2         |
| <b>OXA1L</b>    | Mitochondrial inner membrane protein OXA1L                                                    |
| <b>MAP2K1</b>   | mitogen-activated protein kinase kinase 1 (MAP2K1)                                            |
| <b>MYLC2PL</b>  | myosin light chain 2, precursor lymphocyte-specific (MYLC2PL)                                 |
| <b>MYLK</b>     | myosin light chain kinase                                                                     |
| <b>MYLK2</b>    | myosin light chain kinase 2, skeletal muscle (MYLK2)                                          |
| <b>MYL1</b>     | myosin, light chain 1, alkali; skeletal, fast (MYL1), transcript variant 3f                   |
| <b>MYLK</b>     | myosin, light polypeptide kinase (MYLK), transcript variant 5                                 |
| <b>ASAH1</b>    | N-acylsphingosine amidohydrolase (acid ceramidase) 1 (ASAH1), transcript variant 1            |
| <b>ASAH1</b>    | N-acylsphingosine amidohydrolase (acid ceramidase) 1, mRNA (cDNA clone MGC:24572              |
| <b>OGT</b>      | O-linked N-acetylglucosamine (GlcNAc) transferase (UDP-N-acetylglucosamine:polypeptide-N-     |
| <b>PPT1</b>     | palmitoyl-protein thioesterase 1 (ceroid-lipofuscinosis, neuronal 1, infantile) (PPT1)        |
| <b>PPT2</b>     | palmitoyl-protein thioesterase 2 (PPT2), transcript variant 2                                 |
| <b>PDE4DIP</b>  | phosphodiesterase 4D interacting protein (myomegalin) (PDE4DIP)                               |
| <b>GALNT10</b>  | Polypeptide N-acetylgalactosaminyltransferase 10                                              |
| <b>GALNT13</b>  | Polypeptide N-acetylgalactosaminyltransferase 13                                              |
| <b>PQLC3</b>    | PQ loop repeat containing 3 (PQLC3)                                                           |
| <b>PFN4</b>     | Profilin-4                                                                                    |
| <b>PTGER3</b>   | Prostaglandin E receptor 3 (subtype EP3) (PTGER3), transcript variant 9, mRNA                 |
| <b>PTGES2</b>   | prostaglandin E synthase 2 (PTGES2), transcript variant 2                                     |
| <b>PTGS2</b>    | prostaglandin-endoperoxide synthase 2 (prostaglandin G/H synthase and cyclooxygenase) (PTGS2) |
| <b>PDXK</b>     | pyridoxal (pyridoxine, vitamin B6) kinase (PDXK)                                              |
| <b>RICTOR</b>   | rapamycin-insensitive companion of mTOR (RICTOR)                                              |
| <b>SAR1B</b>    | SAR1 gene homolog B (S. cerevisiae) (SAR1B), transcript variant 2                             |
| <b>SEPT4</b>    | septin 4 (SEPT4), transcript variant 1                                                        |
| <b>SEPT7</b>    | septin 7 (SEPT7), transcript variant 1                                                        |
| <b>SUMO4</b>    | Small ubiquitin-related modifier 4                                                            |
| <b>SPHK1</b>    | sphingosine kinase 1 (SPHK1), transcript variant 1                                            |
| <b>SPHK1</b>    | Sphingosine kinase 1, mRNA (cDNA clone MGC:15041 IMAGE:3831657), complete cds                 |
| <b>SPHK2</b>    | sphingosine kinase 2 (SPHK2)                                                                  |
| <b>SGPL1</b>    | sphingosine-1-phosphate lyase 1 (SGPL1)                                                       |
| <b>TBCEL</b>    | Tubulin-specific chaperone cofactor E-like protein                                            |
| <b>UBIAD1</b>   | UbiA prenyltransferase domain containing 1 (UBIAD1)                                           |
| <b>COQ9</b>     | Ubiquinone biosynthesis protein COQ9, mitochondrial                                           |
| <b>UBE3A</b>    | ubiquitin protein ligase E3A (human papilloma virus E6-associated protein, Angelman syndrome) |
| <b>UBE3C</b>    | ubiquitin protein ligase E3C (UBE3C)                                                          |
| <b>UBE1</b>     | ubiquitin-activating enzyme E1 (UBE1), transcript variant 1                                   |
| <b>UBE1L</b>    | ubiquitin-activating enzyme E1-like (UBE1L)                                                   |
| <b>UBE1L2</b>   | ubiquitin-activating enzyme E1-like 2 (UBE1L2)                                                |
| <b>UBE1C</b>    | ubiquitin-activating enzyme E1C (UBA3 homolog, yeast) (UBE1C), transcript variant 3           |



|                |                                                                   |
|----------------|-------------------------------------------------------------------|
| <b>UBE2A</b>   | ubiquitin-conjugating enzyme E2A (RAD6 homolog) (UBE2A)           |
| <b>UBE2B</b>   | ubiquitin-conjugating enzyme E2B (RAD6 homolog) (UBE2B)           |
| <b>UBE2C</b>   | ubiquitin-conjugating enzyme E2C (UBE2C), transcript variant 1    |
| <b>UBE2C</b>   | ubiquitin-conjugating enzyme E2C (UBE2C), transcript variant 4    |
| <b>UBE2CBP</b> | ubiquitin-conjugating enzyme E2C binding protein (UBE2CBP), mRNA. |
| <b>UBL3</b>    | ubiquitin-like 3 (UBL3)                                           |
| <b>UBL4A</b>   | ubiquitin-like 4A (UBL4A)                                         |
| <b>UBL5</b>    | ubiquitin-like 5 (UBL5), transcript variant 1                     |
| <b>UBL3</b>    | Ubiquitin-like protein 3                                          |
| <b>UBL7</b>    | Ubiquitin-like protein 7                                          |
| <b>YIPF1</b>   | Yip1 domain family, member 1 (YIPF1)                              |

## Chemistry.

### Materials.

All commercially available compounds were used as provided without further purifications. Chemicals and solvents were purchased from the companies Sigma Aldrich, Alfa Aesar, Acros Organics, Merck Chemicals, Life Technologies and Fisher Scientific. Dry solvents for reactions and solvents for column chromatography (laboratory reagent grade or HPLC grade) were used as commercially available. Analytical thin-layer chromatography (TLC) was performed on Merck silica gel aluminium plates with F-254 indicator. Compounds were visualized by irradiation with UV light or potassium permanganate staining or cerium ammonium molybdate (CAM). Column chromatography was performed using silica gel Acros 60 A (particle size 0.035-0.070 nm). NMR were recorded on a Bruker Avance DRX-400 or 500 (400 or 500 MHz) or on a Agilent Technologies Mercury Inova-600 (600MHz). Deuterated solvents were used as internal standards ( $\text{CDCl}_3$ :  $\delta = 7.26$  ppm for  $^1\text{H}$ ,  $\delta = 77.16$  ppm for  $^{13}\text{C}$ ; acetone- $\text{D}_6$ :  $\delta = 2.05$  ppm for  $^1\text{H}$ ,  $\delta = 29.84$  ppm for  $^{13}\text{C}$ ). Chemical shift ( $\delta$ ) values are reported in ppm. Signal characterization is described using the next abbreviations: s (singlet), d (doublet), t (triplet), q and m (multiplet). Coupling constant values are presented in Hertz (Hz). High resolution mass spectra were recorded on a LTQ Orbitrap mass spectrometer coupled to an Accela HPLC-System (flow injection: 50% (containing 0.1% formic acid) water and 50% (containing 0.1% formic acid) acetonitrile, flow rate: 250  $\mu\text{L}/\text{min}$ ). Preparative HPLC-MS was performed on a Agilent Series 1100/LC/MSD VL system, using a Macherey & Nagel Nucleodur VP C4 or C18 column (Solution A: 0.1% TFA in water and Solution B containing 0.1% TFA in acetonitrile). Analytical HPLC-MS was recorded on a Ultimate 3000 (Thermo Fisher Scientific) using a Nucleodur C4 (EC 125/3) or C18 (EC 50/3) column. Mass detection was performed through a LCQ Fleet (Thermo Fisher Scientific) using HESI as ionization technique.

### Synthesis of $\omega\text{N}_3\text{C16Cer}$ (1)

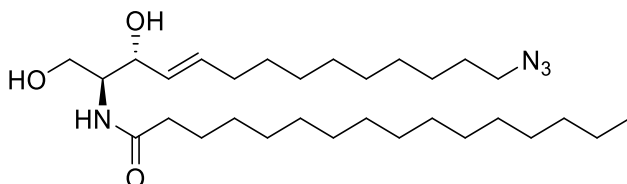

$\omega\text{N}_3\text{Sphingosine}$  was prepared following a previously reported procedure. To prepare  $\omega\text{N}_3\text{C16Cer}$  (1) 20 mg of  $\omega\text{N}_3\text{Sphingosine}$  were dissolved in 1 mL of dry THF and added to a  $0^\circ\text{C}$  cold solution of 50% sodium acetate in water. The mixture was stirred for 10 min and 0.023 mL palmitoyl chloride (0.08 mmol, 1.1 eq) were added dropwise under vigorous stirring. The reaction mixture was stirred for 6 hours at room temperature. The solvent was removed under reduced pressure and the residue was solved in 3 mL diethyl ether. The organic phase was washed with 2 mL of a 2 N ammonium hydroxide solution, water, brine and dried over  $\text{MgSO}_4$  yielding 20 mg (0.04 mmol, 62 %) of  $\omega\text{N}_3\text{C16Cer}$  (1). HPLC-MS:  $m/z$  calcd. for  $\text{C}_{30}\text{H}_{58}\text{N}_4\text{O}_3$ : 523,45  $[\text{M}+\text{H}]^+$ , found 523,24  $[\text{M}+\text{H}]^+$ ; HR-MS  $[\text{M}+\text{H}]^+$ :  $m/z$  calcd. for  $\text{C}_{30}\text{H}_{58}\text{N}_4\text{O}_3$ : 523.4581  $[\text{M}+\text{H}]^+$ , found 523.4577  $[\text{M}+\text{H}]^+$ ;  $^1\text{H}$  NMR (600 MHz,  $\text{CDCl}_3$ ):  $\delta$  8.04 (s, 1H), 5.57 (m, 2H), 4.53 (d,  $J = 8.3$  Hz, 1H), 3.62 – 3.42 (m, 3H), 2.23 (s, 2H), 1.63 – 1.46 (m, 4H), 1.41 – 1.09 (m, 42H), 0.87 (s, 3H);  $^{13}\text{C}$  NMR (151 MHz,  $\text{CDCl}_3$ ):  $\delta$  173.4, 133.8, 129.6, 69.5, 62.4, 53.9, 51.0, 36.6, 34.4, 28.4, 26.6, 25.7, 22.4, 14.0.

### Palmitoyl azide (2)

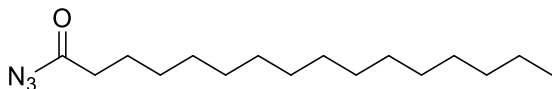

Palmitoyl chloride (5.1 mmol, 0.6 eq) was added dropwise to a pre-chilled solution of 500 mg sodium azide (7.7 mmol, 1 eq) in acetone at  $0^\circ\text{C}$ . The reaction was stirred for 30 min, filtered and the resulting solid was dried under vacuum and used without further purification.

HPLC-MS: m/z calcd. for C<sub>16</sub>H<sub>31</sub>N<sub>3</sub>O: 282.43 [M+H]<sup>+</sup>, found 282.25 [M+H]<sup>+</sup>; HR-MS [M+H]<sup>+</sup>: m/z calcd. for C<sub>16</sub>H<sub>31</sub>N<sub>3</sub>O: 282.2539 [M+H]<sup>+</sup>, found 282.2538 [M+H]<sup>+</sup>; <sup>1</sup>H-NMR (400 MHz Acetone-d<sub>6</sub>): δ 2.41 (t, 2H), 1.62 (m, 2H), 1.35 – 1.24 (m, 24H), 0.88 (s, 3H); <sup>13</sup>C-NMR (101 MHz, Acetone-d<sub>6</sub>): δ 180.2, 38.7, 33.9, 32.2, 31.9, 31.6, 31.5, 31.4, 31.3, 31.1, 30.9, 30.7, 30.3, 26.7, 24.7, 15.8.

## **Biology**

### **Materials**

C16-ceramide was acquired from Santa Cruz Biotechnologies and 1,2-dipalmitoyl-*sn*-glycerol was purchased from Sigma Aldrich. C16-*threo*-Ceramide was prepared following reported procedures.[44] DBCO-PEG4-TAMRA was acquired from Sigma Aldrich. Dibenzocyclooctyne (DBCO) Agarose was purchased from Jena Bioscience, Germany. Complete protease Inhibitor (EDTA free) and PhosSTOP (Phosphatase inhibitor) were purchased from Roche Eagle's Minimum Essential Medium (MEM), Pyruvate, *L*-Glutamine and PenStrep-mix were purchased from PAN BioTech. Foetal calf serum (FCS) was purchased from GIBCO-Invitrogen. LysC and Trypsin (proteomic grade) were acquired from Wako and Roche respectively. Cell culture flasks were purchased from Sarstedt. The ProtoArray® Human protein microarray was purchased from Invitrogen, Thermo Fisher Scientific. SDS-PAGE was performed for standard protein separation using the MiniProtean 3 Gel electrophoresis system (Bio-Rad, Germany); SDS Separating Gel (12%, 20 mL) contains 6.60 mL H<sub>2</sub>O, 8.00 mL Acrylamide mix (30%), 5.00 mL Tris (1.5 M, pH 8.8), 0.20 mL SDS (10%), 0.20 mL Ammonium persulfate (10%) and 0.008 mL TEMED (N, N, N', N'-Tetramethylethylenediamine). SDS Stacking Gel (5%, 5 mL) contains 3.40 mL H<sub>2</sub>O, 0.83 mL acrylamide mix (30%), 0.63 mL Tris (1.0 M, pH 6.8), 0.05 mL SDS (10% (w/v), 0.05 mL Ammonium persulfate (10% (w/v) and 0.005 mL TEMED.

**Cell culture.** Neuro-2a cells (ATCC®CCL-131™, *mus musculus*, mouse) were cultured in Eagle's Minimum Essential Medium (MEM, PAN BioTech, Aidenbach, Germany), supplemented with 10% fetal calf serum (FCS, GIBCO-Invitrogen, Darmstadt, Germany), sodium pyruvate (PAN BioTech, Aidenbach, Germany), *L*-Glutamine and PenStrep-mix (100 U/mL penicillin/100 µg/mL streptomycin (PAN Biotech, Aidenbach Germany) and grown at 37°C in a 5% CO<sub>2</sub> incubator.

### **Preparation of cell lysates**

The Neuro-2a cells were cultured and harvested after they reached confluence. After washing steps with PBS, the cells were incubated with trypsin/EDTA solution for 3-5 min at 37°C in a 5% CO<sub>2</sub> incubator, washed with PBS and lysed in lysis buffer (50 mM NaCl, 5 mM MgCl<sub>2</sub>, 5 mM EGTA, 0.1 % NP-40, 0.1 % Tween-20, 0.1 % TritonX-100, Protease-/phosphatase-inhibitors (Complete protease Inhibitor (EDTA free) and PhosSTOP (Phosphataseinhibitor) Roche), pH 7.4) (protein concentration >2 mg/mL). The cells were unlocked by repeating freeze-thaw cycles and a final ultra-sonication step. The protein concentration of the supernatant was determined by the Bradford method

### **Probe Immobilization on DBCO Agarose**

Homogenised DBCO Agarose (500 µL, 9.38 µmol DBCO-groups/mL resin, *Jena BioScience GmbH, Germany*) were washed two times with 1 mL PBS (140 mM NaCl, 10 mM Phosphate buffer, 3 mM KCl, pH 7.4) and 500 µL of a 2 mM solution of either ωN<sub>3</sub>C16Cer (**1**) or palmitoyl azide (**2**) in PBS (stock solution 10 mM in DMSO) were added to the beads and incubated for 60 min at 4 °C with rotary shaking. The resulting modified beads were then collected and washed twice with PBS.

### **Affinity enrichment/Pull-down (PD) experiments**

100 µL of the corresponding modified DBCO Agarose were collected, washed twice with PBS and 100 µL of cell lysate (2 mg total protein) were added to the beads (ratio cell lysate: beads = 1:1 (v/v)). The mixture was incubated at 4°C overnight with rotary shaking. To remove unbound proteins, the beads were washed twice with lysis buffer (without protease and phosphatase inhibitors) and three more times using increasing concentrations of MgCl<sub>2</sub> (25-75 mM). Finally, the beads were washed two more times for 15 minutes with PBS to remove detergents to facilitate the subsequent mass analysis.

### Sample Preparation for Mass Spectrometry

On-bead digestion. 50  $\mu\text{L}$  of a 8 M denaturing/reducing buffer (8 M urea in 50 mM Tris pH 7.9; 1 mM DTT) were added to 25  $\mu\text{L}$  of the beads and the suspension was incubated for 30 min on a shaker at 350 rpm (37°C). For alkylation, 5  $\mu\text{L}$  of 50 mM chloroacetamide in denaturing/reducing buffer were added to the beads and the mixture was incubated for 30 min on a shaker at 350 rpm at room temperature. 5  $\mu\text{M}$  BSA were used as a positive control of the tryptic digestion. 1  $\mu\text{g}$  of LysC was added to each sample and incubated for 60 min at 37°C on a shaker at 350 rpm to pre-digest the samples. The supernatant was transferred into a new low-binding Eppendorf tube. 150  $\mu\text{L}$  Tris-buffer (50 mM, pH 7.5) containing 1  $\mu\text{g}$  Trypsin were added to the beads and incubated for 60 min on a shaker at 350 rpm (37°C). The supernatants were combined in a new low-binding Eppendorf tube and 2  $\mu\text{g}$  Trypsin (1 mg/mL in 10 mM HCl) were then added. The final digestion was run overnight on a shaker at 350 rpm (37°C). The reaction was stopped by adding 2  $\mu\text{L}$  of concentrated trifluoroacetic acid.

Stage tip purification of on-bead digested samples. Proteins were desalted in C18 stage tips. Briefly, the tips were prepared as follows. Two 3M high performance extraction disks (C18, 47 mm diameter, cat no: 22152) were placed in an ordinary pipette tip. The stage tips were activated by adding 100  $\mu\text{L}$  methanol and centrifuged. They were then washed twice with 100  $\mu\text{L}$  buffer B (20% water/ 80% acetonitrile with 0.1% formic acid), centrifuged, and finally washed with 100  $\mu\text{L}$  buffer A (water with 0.1% formic acid) twice and centrifuged again. After that, the samples were loaded onto the tips, in multiple portions if necessary, incubated for 1 min and centrifuged. The tips were washed once with 100  $\mu\text{L}$  buffer A and peptides were eluted by using 20  $\mu\text{L}$  buffer B twice, centrifuged and collected into new low-binding Eppendorf tubes. The samples were dried in a SpeedVac concentrator and analysed

### Mass spectrometry analysis

The tryptic peptides were separated and analysed using a nano-HPLC/MS/MS. The separations were carried out on an UltiMate™ 3000 RSLCnano system (Dionex, Germany). The MS and MS/MS experiments were carried out on a Q Exactive™ Hybrid Quadrupole-Orbitrap Mass Spectrometer equipped with a nano-spray source (Nanospray Flex Ion Source, Thermo Scientific). All solvents employed were LC-MS grade. The dried tryptic peptides were dissolved in 20  $\mu\text{L}$  of a 0.1 % TFA solution in water. 3  $\mu\text{L}$  of sample were injected onto a pre-column cartridge (5  $\mu\text{m}$ , 100  $\text{\AA}$ , 300  $\mu\text{m}$  ID \* 5 mm, Dionex, Germany) using 0.1 % TFA in water as eluent with a flow rate of 30  $\mu\text{L}/\text{min}$ . Desalting was performed for 5 min with eluent flow to waste followed by back-flushing of the sample during the whole analysis from the pre-column to the PepMap100 RSLC C18 nano-HPLC column (2  $\mu\text{m}$ , 100  $\text{\AA}$ , 75  $\mu\text{m}$  ID  $\times$  50 cm, nanoViper, Dionex, Germany) using a linear gradient starting with 95 % water containing 0.1 % formic acid / 5 % acetonitrile containing 0.1 % formic acid and increasing to 70 % water containing 0.1 % formic acid / 30 % acetonitrile containing 0.1 % formic acid after 95 min using a flow rate of 300 nL / min.

The nano-HPLC was online coupled to the Quadrupole-Orbitrap Mass Spectrometer using a standard coated SilicaTip (ID 20  $\mu\text{m}$ , Tip-ID 10  $\mu\text{m}$ , New Objective, Woburn, MA, USA). Mass range of m/z 300 to 1650 was acquired with a resolution of 70000 for full scan, followed by up to ten high energy collision dissociation (HCD) MS / MS scans of the most intense at least doubly charged ions with a resolution of 17500. Experiments were performed in 4 biological replicates with three technical replicates, each. Data evaluation was performed for each biological replicate separately using the MaxQuant software[56] (v.1.5.2.8) including the Andromeda search algorithm and searching the mouse reference proteome of the Uniprot database together with the contaminant database included in MaxQuant. The search was performed for full enzymatic trypsin cleavages allowing two miscleavages. For protein modifications carbamidomethylation was chosen as fixed and oxidation of methionine and acetylation of the N-terminus as variable modifications. The mass accuracy for full mass spectra was set to 5 ppm and for MS/MS spectra 20 ppm. The false discovery rates for peptide and protein identification were set to 1 %. Only proteins for which at least two peptides were quantified were chosen for further validation. Proteins which were not identified with at least two razor and unique peptides in at least one technical replicate, those from the search of the reverse database used to determine the false discovery rate and known contaminants corresponding to the contaminant database included in MaxQuant were filtered off. Relative quantification of proteins was carried out using the label-free quantification algorithm implemented in MaxQuant. Label-free quantification (LFQ) intensities were logarithmized ( $\log_2$ ), the active samples were grouped together and the negative controls as well. Proteins which were not quantified in at least two technical replicates in at least one group were deleted. After that the medians of the LFQ of each protein per group were calculated (if just one LFQ value exist, this was used as median). All proteins only quantified in the active group or with a difference of at least 2 (1 in the biological experiment using azide instead of palmitoyl azide as negative

control) in the median of the logrithmized LFQ intensities were considered as potential hit of a single biological replicate. In a final step the potential hits of all 12 replicates (4 biological replicates with 3 technical ones, each) were taken together and proteins which were potential hits in at least 8 out of the 12 experiments were listed in Table S1 and merged with the hits resulting from the microarray assay. All proteins quantified in the negative group in the median of the logrithmized LFQ intensities were considered as potential negative hits of a single biological replicate. In a final step the potential hits of all nine replicates (3 biological replicates with 3 technical ones, each) were taken together and proteins which were potential hits in at least 6 out of the 9 experiments were listed as potential hydrophobic binders and removed from the final hit list.

### **Protein Microarray**

The identification of ceramide binding proteins was done by following the vendor's instructions. The microarray was pre-chilled from -20 °C to 4°C for around 20 min and washed with 5 mL SMI-buffer (50 mM Tris-HCl pH 7.5, 5 mM MgSO<sub>4</sub>, 0.1% Tween 20, 1x Roti®Block (Carl Roth, Germany)) for 60 min at 4°C in a humidity chamber under mild orbital shaking (50 rpm). After removal of the buffer, 600 µL of the corresponding ceramide analogue (10 µM in SMI-buffer) were added dropwise to the microarray and the slide was incubated for 90 min at 4 °C in a humidity chamber under orbital shaking at 50 rpm. Afterwards, the slide was washed 3 times with 5 mL SMI-buffer for 5 min (50 rpm, 4°C). For the copper-free click reaction 5 mL of a 100 µM DBCO-PEG4-TAMRA solution in SMI-buffer were added dropwise to the microarray. After incubation for 45 min at 4°C under orbital shaking (50 rpm) in a dark humidity chamber, all solutions were removed and the slide was washed 3 times with 5 mL SMI-buffer. Finally, the microarray was dipped in ddH<sub>2</sub>O, to remove remaining salts, and completely dried under argon. To ensure the drying process, the slides were additionally centrifuged at 200 x g for 1 min at room temperature. The chip was protected from light until being analysed using a Typhoon®-Microarray Scanner system (Abs/Em = 545/567nm).

### **Microarray analysis**

Spot and background intensity were measured for each spot. Data were normalised against background and only signals that were at least 2-fold or more than the background were considered to be potential interacting candidates. Two additional criteria were used to define a significant interaction between a protein and ceramide: A Z-score greater than 3.0 (Z-score was calculated by subtracting the overall average intensity from the raw intensity data for each spot, and dividing that result by the SD of the measured intensities) and a replicate spot CV less than 50%, where CV is the coefficient of variation for the assay from duplicate spots, determined by dividing the SD of the spot signals by their mean intensity.

### **Immunoblotting**

Cells were collected and lysed following the procedure described above. Protein concentration was determined using the Bradford method. DBCO-beads were modified and treated with cell lysates as described above. To release the proteins from the beads, samples were adjusted to the same protein concentration, mixed with SDS loading buffer (5x, 50% (v/v) glycerol, 250 mM Tris (pH 6.8), 350 mM SDS, 500 mM DTE, 360 µM bromophenol blue) and boiled for 5-10 min at 96°C prior to loading onto the gel. Protein samples were loaded onto a SDS gel. The separation of the proteins was conducted in SDS running buffer (2.5 M glycine, 250 mM Tris, 35 mM SDS) at 40 mA per gel for 1 h at room temperature. Estimation of the protein size was performed in reference to the PageRuler™ Plus Prestained Protein Ladder (Thermo Fisher Scientific). To stain the proteins, the SDS gel was incubated with a fixing Solution (10% (v/v) glacial acetic acid, 40% (v/v) ethanol, in water) for 15 min and immediately transferred into a Coomassie Staining Solution (0.25% (w/v) Coomassie brilliant blue G-250, 45% (v/v) methanol, 10% (v/v) acetic acid) and stained for 1 h. Afterwards the SDS gel was de-stained using a de-staining Solution (30% (v/v) methanol, 10% (v/v) acetic acid) and rinsed with ddH<sub>2</sub>O. The gel was imaged using the Gellogig 200 Imaging System (KODAK) and KODAK-Mi software.

The proteins separated by SDS-PAGE were transferred by means of semi-dry electroblotting to a polyvinylidene difluoride (PVDF) membrane (Immobilon® FL- Transfer Membrane, Thermo Scientific, Schwerte, Germany) with a Bio-Rad Trans-Blot semi-dry blotter for 60 min at 25 V prior to the electrotransfer, all the layers were soaked in freshly prepared transfer buffer (14.41 g/L glycine, 3.03 g/L Tris, 20% (v/v) MeOH, in water). Membranes were blocked for 30 min using 2% (w/v) non-fat dry milk powder in PBS-buffer containing 0.05 % (v/v) Tween-20, pH 7.5 (PBS-T). The appropriate primary antibody was incubated overnight at 4°C in the buffer following vendor's instructions. Anti- $\alpha$ -tubulin was employed to detect  $\alpha$ -tubulin as loading control. Unbound antibodies were removed by washing with PBS-T buffer for 10 min (3 times). The

corresponding secondary antibody was added according to vendor's instructions and incubated for 1 h at room temperature at constant agitation in the dark. The membrane was again washed twice with PBS-T buffer (10 min) and twice with PBS (10 min) to decrease the detergent concentration. Signals were detected using Super-Signal West Pico Chemiluminescent Substrate (Thermo Scientific) and scanned employing an Odyssey® Fc Imaging System (Li-COR® Bioscience, Bad Homburg, Germany).

#### Primary antibodies for immunoblotting

| Antibody     | Organism | Order No     | Dilution | Supplier                  |
|--------------|----------|--------------|----------|---------------------------|
| Anti-Tubulin | mouse    | # F2168      | 1:1000   | Sigma Aldrich             |
| Anti-Bcl-xL  | rabbit   | # 2764       | 1:1000   | CellSignaling Technology® |
| Anti-mTOR    | rabbit   | # 2983       | 1:1000   | CellSignaling Technology® |
| Anti-mTOR    | mouse    | # 4517       | 1:1000   | CellSignaling Technology® |
| Anti-Aifm2   | rabbit   | # PA5-24562  | 1:1000   | Thermo Scientific         |
| Anti-PPT1    | rabbit   | # WA-AP2538b | 1:1000   | Biomol                    |
| Anti-Bax     | rabbit   | # sc-526     | 1:200    | Santa Cruz Biotechnology  |
| Anti-Ergic1  | goat     | # sc-107206  | 1:200    | Santa Cruz Biotechnology  |
| Anti-Oxa1L   | mouse    | # sc-365534  | 1:200    | Santa Cruz Biotechnology  |
| Anti-CERT    | rabbit   | # PA5-28788  | 1:500    | Invitrogen™               |
| Anti-BUD31   | mouse    | # sc-374163  | 1:200    | Santa Cruz Biotechnology  |
| Anti-APP     | rabbit   | # A8717      | 1:200    | Sigma Aldrich             |
| Anti-Gal1    | mouse    | # 40103      | 1:1000   | CellSignaling Technology® |
| Anti-Gal3    | rabbit   | # 87985      | 1:1000   | CellSignaling Technology® |

#### Secondary antibodies for immunoblotting

| Secondary Antibody       | Reactivity | Order No    | Supplier                 |
|--------------------------|------------|-------------|--------------------------|
| donkey-anti-goat HRP     | Goat       | # sc-2033   | Santa Cruz Biotechnology |
| goat-anti-mouse HRP      | Mouse      | # 31430     | Thermo Scientific        |
| goat-anti-rabbit HRP     | Rabbit     | # 31460     | Thermo Scientific        |
| donkey-anti-goat IR680   | Goat       | # 926-68074 | Li-Cor                   |
| donkey-anti-goat IR800   | Goat       | # 926-32214 | Li-Cor                   |
| donkey-anti-mouse IR680  | Mouse      | # 926-68072 | Li-Cor                   |
| goat-anti-mouse IR800    | Mouse      | # 926-32210 | Li-Cor                   |
| donkey-anti-rabbit IR680 | Rabbit     | # 926-68073 | Li-Cor                   |
| donkey-anti-rabbit IR800 | Rabbit     | # 926-32213 | Li-Cor                   |
| goat-anti-rat IR800      | Rat        | # 926-32219 | Li-Cor                   |

#### Competition experiments

For the competitive experiments, increasing concentrations (50 –500 µM) of C16-Cer were added to the cell lysates (2 mg of total protein). The mixture was incubated at 4°C for 2 h with rotary shaking. The corresponding modified DBCO Agarose (ration cell lysates: beads= 1:1 (v/v)) was added to the preincubated mixture and incubated at 4°C overnight with rotary shaking. To remove unbound proteins, the beads were washed twice with PBS, boiled with 5xSDS-loading buffer and further processed by SDS-gel and immunoblot analysis as described above.

### **Cellular thermal shift assay**

Cells were harvested, lysed and divided into two equal portions of 1300  $\mu$ L. 13  $\mu$ L of a 10 mM stock solution of C16-Cer in DMSO or a 10 mM solution of Palmitic acid in DMSO were added to 1300  $\mu$ L of cell lysate (protein concentration 8 mg/mL), resulting in a final concentration of 100  $\mu$ M of C16-Cer and 1% DMSO. Analogously, 13  $\mu$ L of DMSO were added to 1300  $\mu$ L of cell lysate. The samples were pre-incubated for 10 min at room temperature and divided into ten equal samples (130  $\mu$ L). Samples were heated for 5 min to the target temperature (range: 42.0-63.40  $^{\circ}$ C) and then incubated for 5 min at room temperature. Samples were then centrifuged and the supernatant was transferred into a new eppendorf tube, boiled with 5xSDS-loading buffer and further processed by SDS-gel and immunoblot analysis. Data was normalized to protein content in the samples at 42.0  $^{\circ}$ C. Data represent mean values  $\pm$  S.D. n=3 and was analysed by a Student's two-tailed t-test with GraphPad Prism<sup>®</sup> software version 5.0 (GraphPad, San Diego, CA, USA) and it is represented as mean  $\pm$  SD.

### **Protein expression and purification**

Fully sequenced human cDNA constructs for BCL-XL was purchased from Addgene (#46972 pCDH-puro-BCL-XL, Addgene, USA). cDNA construct for AIFm2 was a kind gift of Dr S. Kapoor. The nucleotide sequence corresponding to the proteins was amplified and subcloned in a pOPIN-NHis-3C. vector. Proteins were expressed in *Escherichia coli* cells BL21 (DE3) after autoinduction at 25  $^{\circ}$ C in the presence of ampicillin and purified by means of Ni-sepharose affinity chromatography followed by size-exclusion chromatography. Gal-1 and iFABP were a kind gift of Prof. H. Waldmann and Dr. I. Vetter, respectively.

### **Differential scanning fluorimetry (DSF)**

Differential scanning fluorimetry (DSF) assay was performed using a RT-PCR device (CFX96 Real-Time System; C1000 Touch Thermal Cycler (BIO-RAD)) as previously described. [40, 41]DSF was carried out by equilibrating the samples at 25  $^{\circ}$ C for 5 minutes and then increasing temperature to 90  $^{\circ}$ C at a rate of 2  $^{\circ}$ C/minute. Data points were collected at 0.5  $^{\circ}$ C intervals. Data evaluation for melting temperatures was performed using a pre-installed analysis software provided with the instrument (CFX Manager Version 3.1.1517.0823). Optimal concentrations of the protein and SYPRO orange dye were determined by performing DSF on a grid of varying concentrations of protein and SYPRO orange in PBS Buffer. The optimal conditions were  $\sim$ 0.25 mg/mL protein in PBS Buffer and 2X SYPRO orange (diluted from 5000X stock) within the reaction well, as determined by maximum range of relative Fluorescence Units observed in the melting curves. In a single well of a 96-well PCR plate, a 20  $\mu$ L reaction was conducted by combining 10  $\mu$ L of protein solution (SYPRO orange in PBS Buffer) and 10  $\mu$ L of a solution containing lipids diluted from 10mM DMSO stock with SYPRO orange in PBS Buffer) or 2 % DMSO (v/v) in SYPRO orange in PBS Buffer (as vehicle control). All experiments were done in triplicates.

### **Supplementary References**

Cox, J., and Mann, M. (2008). MaxQuant enables high peptide identification rates, individualized p.p.b.-range mass accuracies and proteome-wide protein quantification. *Nat Biotechnol* 26, 1367-1372.

Niesen, F.H., Berglund, H., and Vedadi, M. (2007). The use of differential scanning fluorimetry to detect ligand interactions that promote protein stability. *Nat protoc* 2, 2212-2221.

## Supplementary Figures

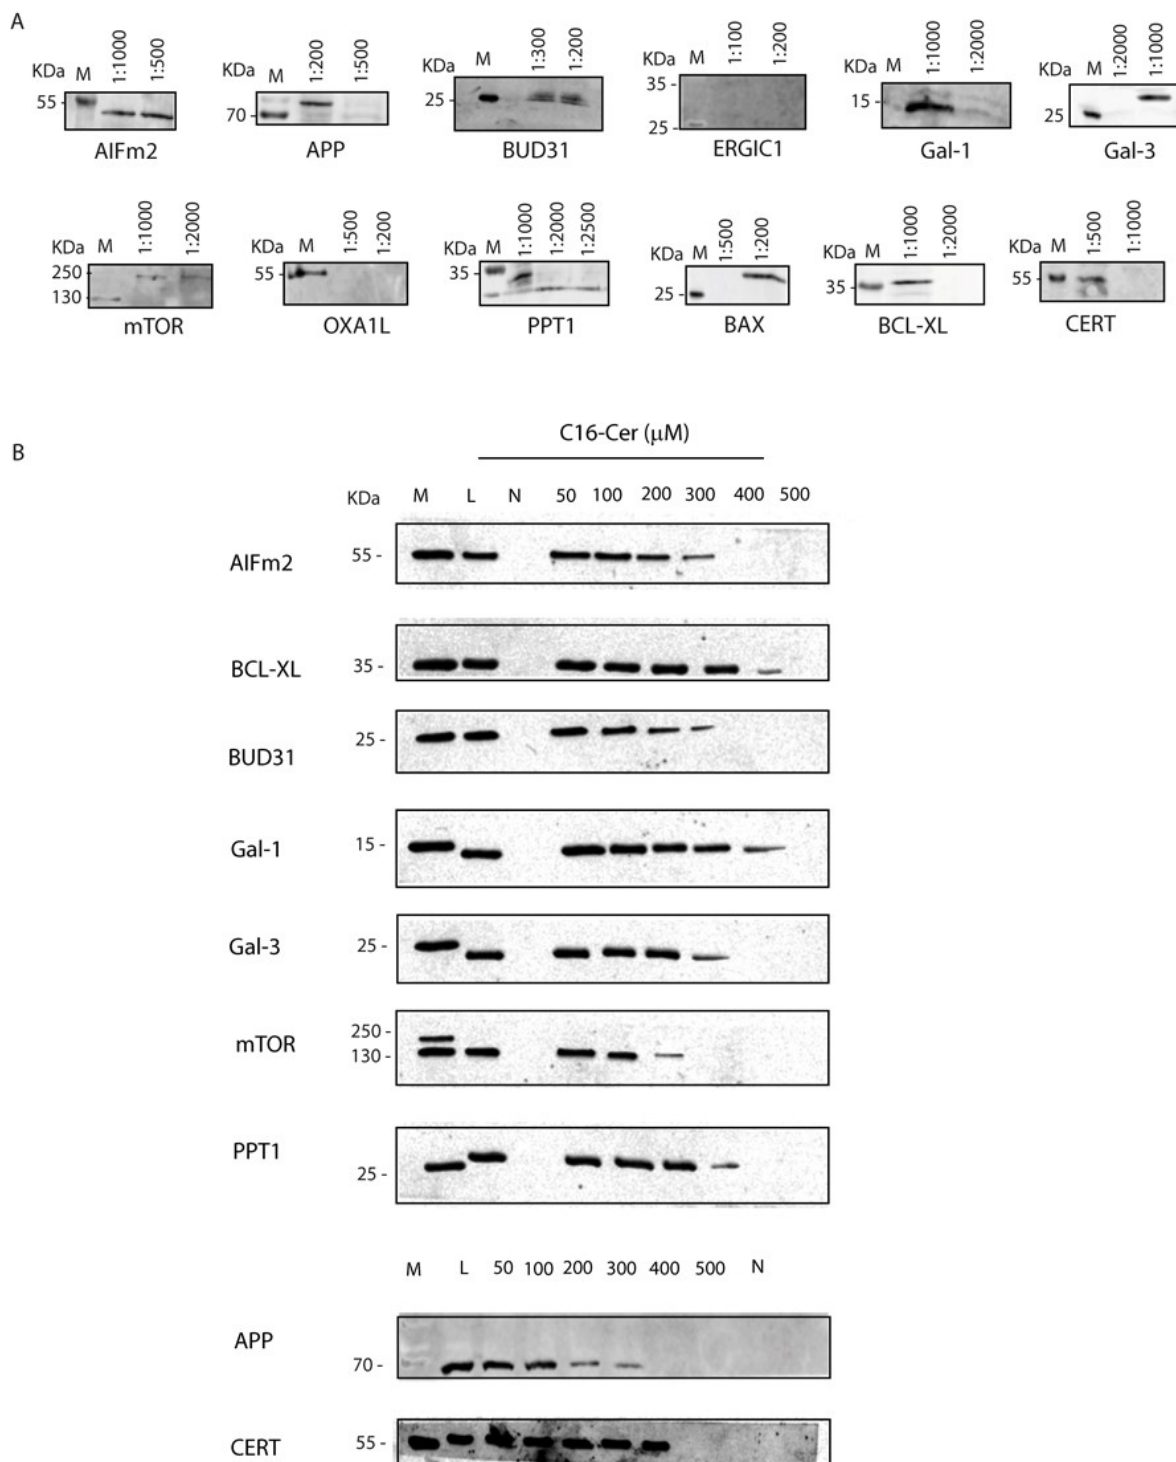

Figure S1. A) Experimental validation of representative ceramide targets. N2a cell lysates were treated with ceramide-modified DBCO agarose. Protein-lipid complexes presents were enriched and analysed by SDS-PAGE and Western blotting. Representative blots of 5



biological replicates. B) Representative blots of competition experiments with C16-ceramide. M; marker, L; lysate, N; negative control.

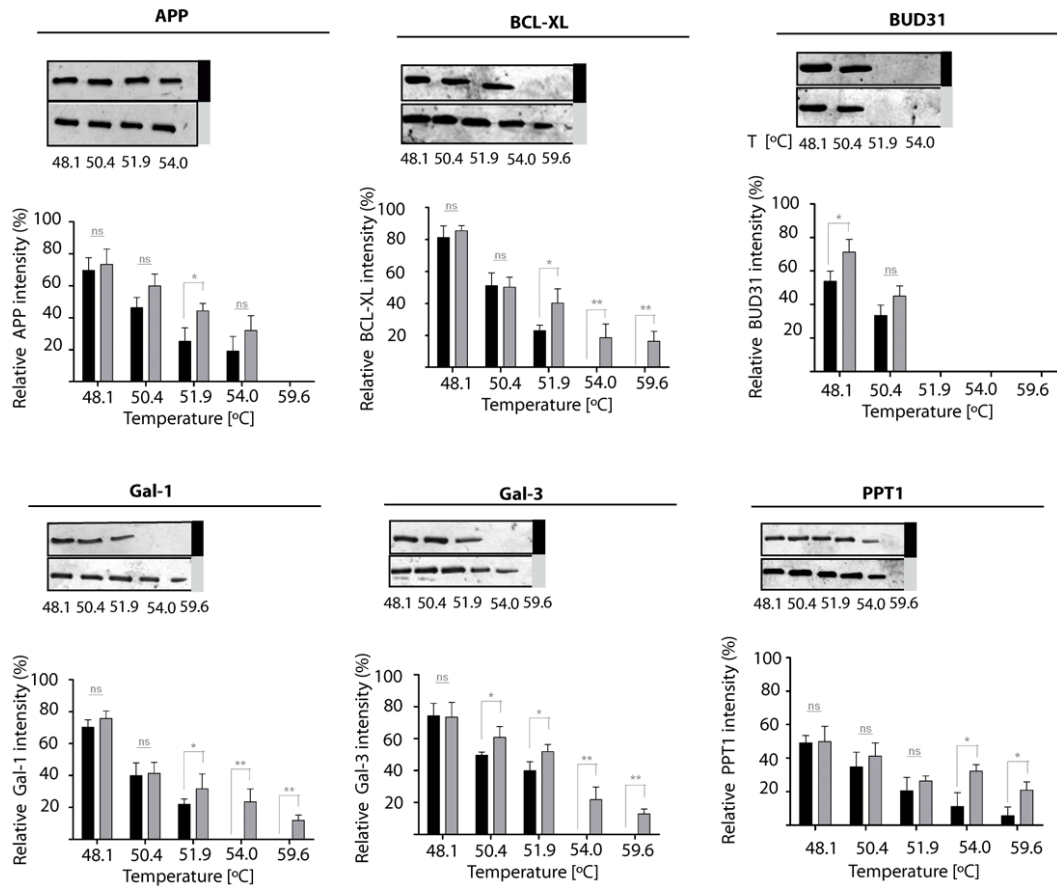

Figure S2. Cellular thermal shift assays were performed to measure the binding ability of C16-Cer to the tested proteins. Cell lysates were incubated with DMSO (1%), with C16-Cer (100  $\mu$ M, 1% DMSO) or with palmitic acid (100  $\mu$ M, 1% DMSO). Data was normalized to protein content (42 °C) and are presented as mean  $\pm$  SD (n = 3). A student's two-tailed t test was used to determine P values \*P < 0.05, \*\*P < 0.01, NS: not significant.

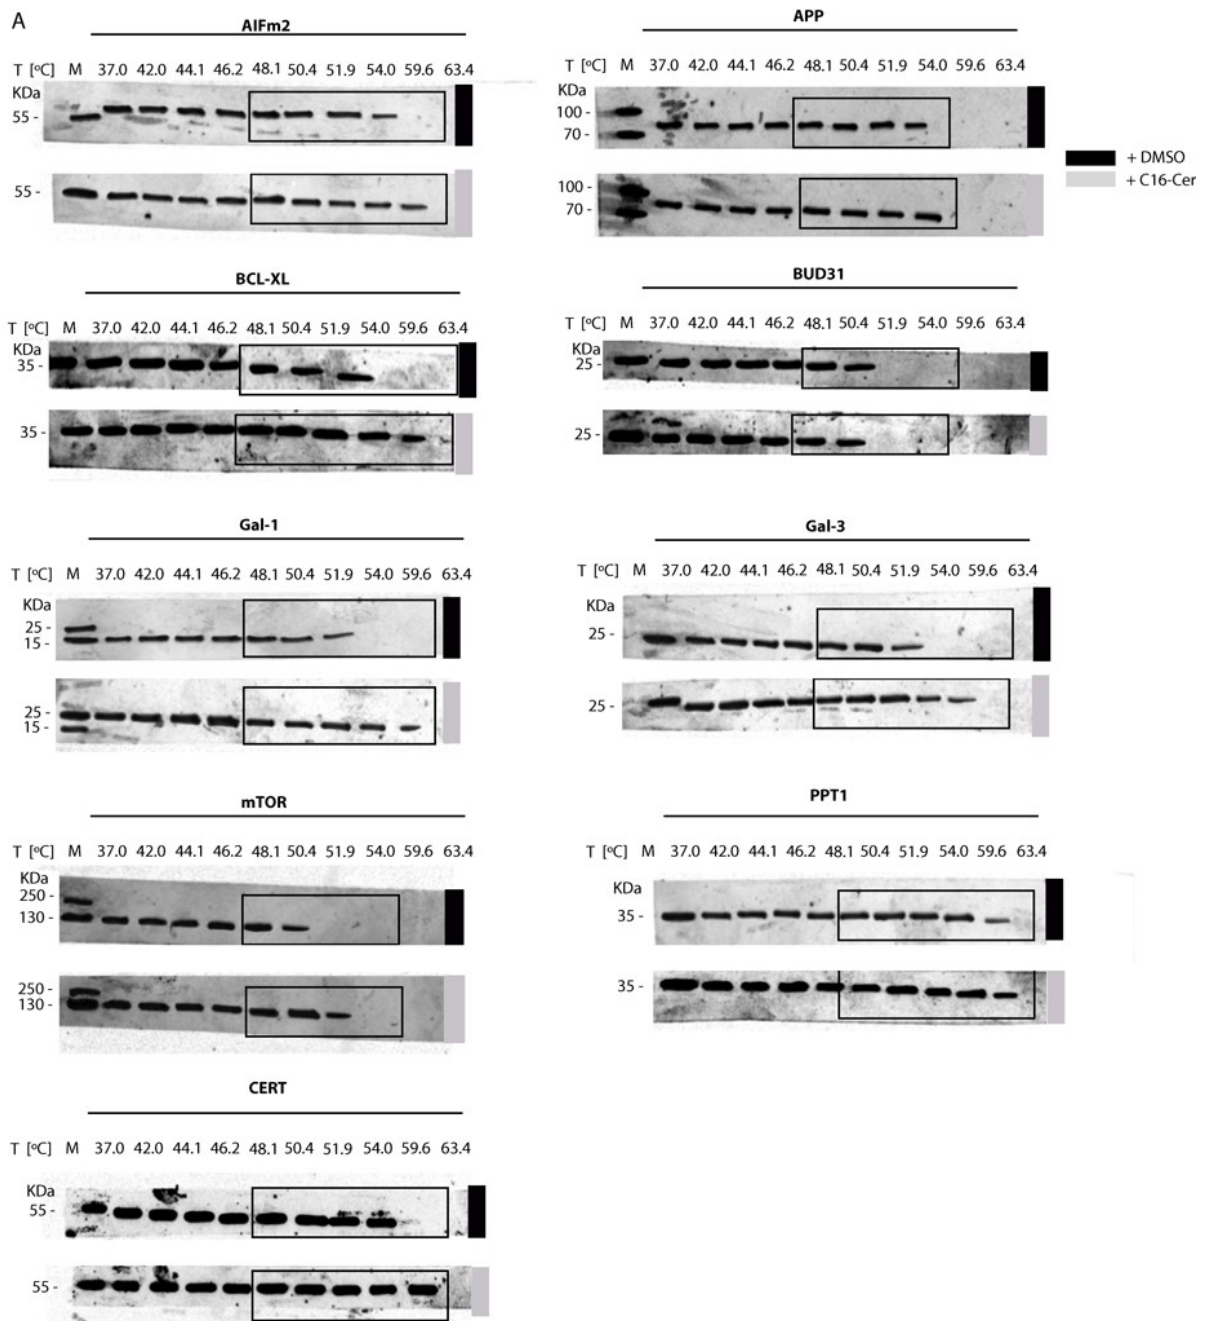

Figure S3. Cellular thermal shift assay was performed to measure the binding ability of C16-Ceramide (100  $\mu$ M, 1% DMSO) to the tested proteins. Uncropped images of the blots.

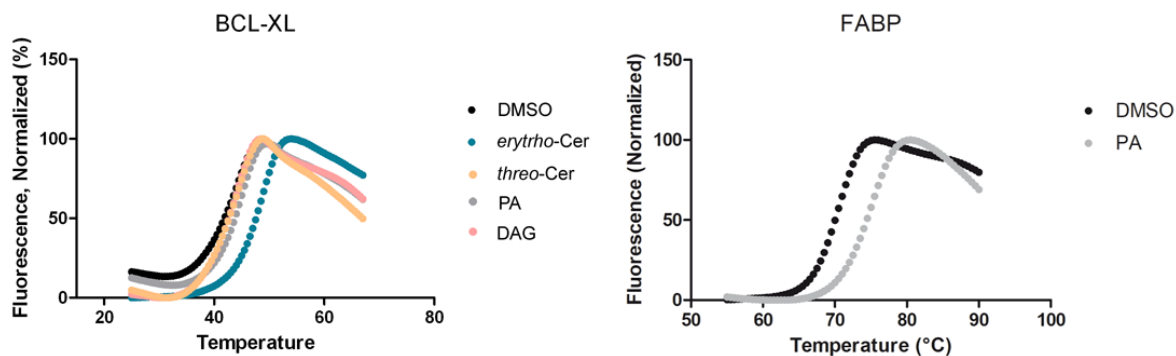

Figure S4. Differential scanning fluorimetry. Experiments were performed in the absence of any compounds as a negative control (DMSO) and in the presence (10  $\mu\text{M}$ ) of *erythro*-Cer, *threo*-Cer, palmitic acid (PA) or diacylglycerol (DAG). Presence of *erythro*-Cer and palmitic acid resulted in stabilization of BCL-XL ( $\Delta T_m$  of 5.9  $^{\circ}\text{C}$ ) and iFABP ( $\Delta T_m$  of 4.7  $^{\circ}\text{C}$ ) respectively. The inflection point of each transition curve is considered melting temperature  $T_m$  and the increase in  $\Delta T_m$  is an indication of binding.
